# Supplementary material
Source: HighWire-hosted journal article supplement (http://thorax.bmjjournals.com/highwire/filestream/173721/field_highwire_adjunct_files/0/tx40881corr1.pdf)
Supplement: tx40881corr1.pdf [file tx40881corr1.pdf]

**CORRECTION**

doi: 10.1136/thx.2005.040881corr1

In the paper entitled “Hormone replacement therapy, body mass index and asthma in perimenopausal women: a cross sectional survey” by F Gómez Real *et al* published in the January 2006 issue of *Thorax* (2006;**61**:34–40), the fourth author should be **K A Franklin**, not K Franklin.
